# Supplementary material for: Pregnant Patients with COVID-19 Admitted to an ICU: A Comparison with a Historical Cohort of Critical Pregnant Patients without COVID-19
Source: MDPI journal article supplement (doi:10.3390/life14020165), 2024-01-23
Supplement: s1 [file s1]

# Pregnant Patients with COVID-19 Admitted to an ICU: A Comparison with a Historical Cohort of Critical Pregnant Patients without COVID-19

Carmine Iacovazzo <sup>1</sup>, Letizia Capasso <sup>2</sup>, Carola Visani <sup>1</sup>, Serena Salomè <sup>2</sup> and Maria Vargas <sup>1,\*</sup>

<sup>1</sup> Department of Neurosciences, Reproductive and Odontostomatological Sciences, University of Naples Federico II, 80100 Naples, Italy

<sup>2</sup> Department of Translational Medical Sciences, Division of Neonatology, University of Naples Federico II, Via Pansini 5, 80131 Naples, Italy; letizia.capasso@unina.it (L.C.); serena.salome@unina.it (S.S.)

\* Correspondence: vargas.maria82@gmail.com; Tel.: +39-0817473550

**Table S1.** Maternal characteristics at the ICU admission.

|                                                                | Pregnant pts with<br>COVID-19<br>n = 11 | Pregnant pts without<br>COVID-19<br>n = 38 | <i>p</i> |
|----------------------------------------------------------------|-----------------------------------------|--------------------------------------------|----------|
| Maternal age (y) (mean; SD; range)                             | 32.2; 4.6; 25–40                        | 32.9; 6.3; 18–44                           | 0.77     |
| Body mass index (kg/m <sup>2</sup> )<br>(mean; SD; range)      | 34.6; 7.7; 24.91–47.75                  | 28.8; 4.2; 22.3–36.4                       | 0.04     |
| Primigravida                                                   | 2; 16.6%                                | 12; 31%                                    | 0.13     |
| Patients with at least one previous<br>cesarean section (n; %) | 8; 73%                                  | 22; 58%                                    | 0.65     |
| Multiple pregnancy ** (n; %)                                   | 1; 8.4%                                 | 2; 5%                                      | 0.45     |

**Table S2.** Maternal comorbidities of the patients at the ICU admission.

| Comorbidities                | Pregnant pts with<br>COVID-19<br>n = 11 | Pregnant pts without<br>COVID-19<br>n = 38 |      |
|------------------------------|-----------------------------------------|--------------------------------------------|------|
| Heart disease                | 0%                                      | 5; 13%                                     | 0.21 |
| Arterial Hypertension        | 0                                       | 2; 3%                                      | 0.45 |
| Hemostatic disorder          | 0                                       | 1; 5%                                      | 0.6  |
| Asthma                       | 0                                       | 1; 2.5%                                    | 0.61 |
| Autoimmune disease           | 0                                       | 1; 2.5%                                    | 0.58 |
| Hypothyroidism               | 2; 20%                                  | 3; 8%                                      | 0.26 |
| Malignancy                   | 0                                       | 2; 5%                                      | 0.42 |
| Chronic renal failure        | 0                                       | 0                                          | -    |
| Diabetes mellitus type I     | 0                                       | 1; 2.5%                                    | 0.78 |
| Chronic Infection (HIV, HBV) | 0                                       | 1; 2.5%                                    | 0.78 |
| Cerebrovascular accident     | 0                                       | 2; 5%                                      | 0.67 |
| Twin pregnancy               | 1; 9%                                   | 2; 5%                                      | 0.9  |

**Table S3.** clinical features and characteristics of pregnant patients with COVID-19 admitted in ICU.

| Case | Vaccinal status | Gestational age at ICU Admission (weeks) | Delivery during Admission                  | Days between Admission and Delivery | Age at Gestational Delivery (weeks) | Mode of Delivery | Indication for Delivery | Pao/FIO before Intubation     | Duration of Mechanical Ventilation <sup>†</sup> (d) | ICU Length of Stay <sup>†</sup> (d) | Hospital Length of Stay <sup>†</sup> (d) | Maternal Outcome | CT COVID-19 score (according Chung - Radiology 2020; 295:202-207) |
|------|-----------------|------------------------------------------|--------------------------------------------|-------------------------------------|-------------------------------------|------------------|-------------------------|-------------------------------|-----------------------------------------------------|-------------------------------------|------------------------------------------|------------------|-------------------------------------------------------------------|
| 1    | No              | 26                                       | yes                                        | 3                                   | 27                                  | Cesarean sec-    | Respiratory failure     | 71.9                          | 45                                                  | 60                                  | 60                                       | Alive            | 19/20                                                             |
| 2    | No              | 26                                       | yes                                        | 1                                   | 26                                  | Cesarean sec-    | Respiratory failure     | 46.5                          | 26                                                  | 46                                  | 55                                       | Alive            | 19/20                                                             |
| 3    | no              | 27                                       | No (delivery the day before the admission) | 0                                   | 27                                  | Cesarean sec-    | Respiratory failure     | 75.7                          | 56                                                  | 56                                  | 67                                       | Dead             | 18/20                                                             |
| 4    | No              | 36                                       | No (delivery 2 days before admission)      | 0                                   | 35+5                                | Cesarean sec-    | Respiratory failure     | 39.7                          | 6                                                   | 6                                   | 12                                       | Dead             | 15/20                                                             |
| 5    | No              | 38                                       | Yes                                        | 1                                   | 38+1                                | Cesarean sec-    | Respiratory failure     | 83.7                          | 4                                                   | 6                                   | 21                                       | Alive            | 18/20                                                             |
| 6    | No              | 33                                       | No (4 days before admission)               | 4                                   | 33+3                                | Cesarean sec-    | Respiratory failure     | Only non-invasive ventilation | 2                                                   | 3                                   | 7                                        | Alive            | 14/20                                                             |
| 7    | No              | 33                                       | No (2 days before admission)               | 2                                   | 33                                  | Cesarean sec-    | Respiratory failure     | Only non-invasive ventilation | 2                                                   | 5                                   | 9                                        | Alive            | 11/20                                                             |
| 8    | No              | 33                                       | Yes                                        | 0                                   | 33                                  | Cesarean sec-    | Respiratory failure     | 98                            | 10                                                  | 16                                  | 21                                       | Alive            | 17/20                                                             |
| 9    | No              | 30                                       | Yes                                        | 0                                   | 30+1                                | Cesarean sec-    | Respiratory failure     | 56                            | 3                                                   | 6                                   | 11                                       | Alive            | 12/20                                                             |
| 10   | No              | 33                                       | No (1 day before admission)                | 2                                   | 33+1                                | Cesarean sec-    | Respiratory failure     | 91.5                          | 13                                                  | 14                                  | 16                                       | Dead             | 18/20                                                             |
| 11   | No              | 19                                       | No                                         | 6                                   | 20                                  | Cesarean section | Status epilepticus      | 87                            | 17                                                  | 23                                  | 51                                       | Alive            | 5/20                                                              |

**Table S4.** newborn outcomes between the groups.

|                                            | Newborn from Pregnant pts<br>with COVID-19 | Newborn from Pregnant pts<br>without COVID-19 | <i>p</i> |
|--------------------------------------------|--------------------------------------------|-----------------------------------------------|----------|
| Gestational age (weeks)                    | 30.6; 5.4                                  | 34; 4                                         | 0.03     |
| Born alive                                 | 11/12                                      | 36/40                                         | 0.96     |
| Birth weight (gr)                          | 1754.54; 770.6                             | 2328.15; 841.3                                | 0.048    |
| Apgar at 5 minutes                         | 7.6; 1.6                                   | 7.94; 1.61                                    | 0.43     |
| Cardiopulmonary resuscitation at the birth | 6/11                                       | 4/40                                          | 0.013    |
